# Supplementary material
Source: PubMed Central journal article supplement (PMC6428420)
Supplement: NIHMS1003734-supplement-Supporting_Information.pdf [file NIHMS1003734-supplement-Supporting_Information.pdf]

## Supporting Information

**Super-Resolution Imaging of Amyloid Structures over Extended Times Using Transient Binding of Single Thioflavin T Molecules**

Kevin Spehar<sup>†</sup>, Tianben Ding<sup>†</sup>, Yuanzi Sun, Niraja Kedia, Jin Lu, George R. Nahass, Matthew D. Lew<sup>\*</sup>, Jan Bieschke<sup>\*</sup>

**Abstract:** Oligomeric amyloid structures are crucial therapeutic targets in Alzheimer's and other amyloid diseases. However, these oligomers are too small to be resolved by standard light microscopy. We have developed a simple and versatile tool to image amyloid structures using Thioflavin T without the need for covalent labeling or immunostaining. Dynamic binding of single dye molecules generates photon bursts that are used for fluorophore localization on a nanometer scale. Thus, photobleaching cannot degrade image quality, allowing for extended observation times. Super-resolution Transient Amyloid Binding (TAB) microscopy promises to directly image native amyloid using standard probes and record amyloid dynamics over minutes to days. We imaged amyloid fibrils from multiple polypeptides, oligomeric, and fibrillar structures formed during different stages of amyloid- $\beta$  aggregation, as well as the structural remodeling of amyloid- $\beta$  fibrils by the compound epi-gallocatechin gallate (EGCG).

**DOI:** 10.1002/anie.2016XXXXX

**Table of Contents**

|                                                                                               |    |
|-----------------------------------------------------------------------------------------------|----|
| Table of Contents .....                                                                       | 2  |
| Supporting Notes .....                                                                        | 4  |
| 1. A $\beta$ 42 and A $\beta$ 40 Preparation .....                                            | 4  |
| 2. Imaging Sample Preparation .....                                                           | 4  |
| 3. A $\beta$ 42 Monomer Labeling Procedure .....                                              | 4  |
| 4. Intrinsically-Labeled A $\beta$ 42 Preparation .....                                       | 4  |
| 5. Antibody-Labeled A $\beta$ 42 Preparation .....                                            | 4  |
| 6. $\alpha$ -Synuclein Preparation .....                                                      | 4  |
| 7. IAPP Preparation .....                                                                     | 4  |
| 8. Tau Protein Preparation .....                                                              | 5  |
| 9. Light Chain Preparation .....                                                              | 5  |
| 10. Optical Instrumentation .....                                                             | 5  |
| 11. Imaging Procedure .....                                                                   | 5  |
| 12. Atomic Force Microscopy .....                                                             | 5  |
| 13. Quantification of Photons Detected, Background Photons, and Localization Precision .....  | 5  |
| 14. Dual-Channel Registration .....                                                           | 6  |
| 15. Amyloid Structure Reconstruction and Region of Interest Selection .....                   | 6  |
| 16. Localization Grouping across Consecutive Frames .....                                     | 6  |
| 17. Imaging Buffer Comparison .....                                                           | 6  |
| Supporting Figures .....                                                                      | 7  |
| Figure S1. Detailed schematics of the optical setups .....                                    | 7  |
| Figure S2. Analysis of ThT localization and blinking events .....                             | 8  |
| Figure S3. Imaging buffer effects on ThT blinking .....                                       | 9  |
| Figure S4. Analysis of Alexa-647 dSTORM .....                                                 | 10 |
| Figure S5. TAB super-resolution images of various amyloids .....                              | 11 |
| Figure S6. Localization rate of single ThT molecules during TAB imaging .....                 | 12 |
| Figure S7. Time-lapse TAB super-resolution images of A $\beta$ 42 remodeling .....            | 13 |
| Supporting Tables .....                                                                       | 14 |
| Table S1. Components of the optical setups .....                                              | 14 |
| Table S2. Imaging buffers .....                                                               | 14 |
| Table S3. Experimental conditions and photon statistics .....                                 | 15 |
| Supporting Movies .....                                                                       | 16 |
| Movie S1. Concatenated TAB super-resolution images of A $\beta$ 42 remodeling over 50 h ..... | 16 |
| References .....                                                                              | 16 |
| Author Contributions .....                                                                    | 16 |



## Supporting Notes

Unless stated otherwise, all chemicals were purchased from Sigma-Aldrich and are ACS grade.

### 1. A $\beta$ 42 and A $\beta$ 40 Preparation

Crude A $\beta$ 42 and A $\beta$ 40 peptide purchased from Watsonbio Sciences was purified *via* reverse-phase high-performance liquid chromatography (HPLC), lyophilized, then dissolved in hexafluoro-2-propanol (HFIP), and sonicated at room temperature for one hour in a water bath sonicator. After freezing in liquid nitrogen, HFIP was removed by lyophilization, and aliquots of the peptide were stored at  $-20$  °C. To prepare unlabeled monomer, lyophilized A $\beta$ 42 and A $\beta$ 40 were dissolved in 10 mM NaOH, sonicated for 25 min in a cold water bath, and filtered first through a 0.2  $\mu$ m and then through a 30 kD membrane filter (Millipore) as described previously.<sup>[1]</sup>

To prepare fibrils, we incubated 10  $\mu$ M monomeric A $\beta$ 40 in PBS (150 mM NaCl, 50 mM Na<sub>3</sub>PO<sub>4</sub>, pH 7.4) at 37 °C with 5 seconds of shaking every 10 minutes in a non-binding 96-well black wall, clear bottom (Corning 3651) plate. 20  $\mu$ M ThT was added for monitoring fibril aggregation kinetics using the ThT fluorescence in a microplate reader (Tecan, Infinite F200). Samples were removed and flash frozen in liquid nitrogen at various time points to obtain samples from different stages of A $\beta$ 40 aggregation (8 hours, 24 hours, 66 hours). Monomeric A $\beta$ 42 (60 - 110  $\mu$ M) was aggregated at 37 °C in PBS with shaking for 24 hours under analogous conditions.

### 2. Imaging Sample Preparation

8-well cell culture chambers with optical glass coverslip bottom (Lab Tek, No. 1.5H, 170  $\pm$  5  $\mu$ m thickness) were cleaned using a UV Ozone Cleaner (Novascan Technologies) for 15 minutes. Amyloid solutions were prepared as described in "A $\beta$ 42 and A $\beta$ 40 Preparation". 10  $\mu$ L solution + 20  $\mu$ L distilled water (dH<sub>2</sub>O) was adsorbed to the coverslip for 1 hour. The coverslip was rinsed with 500  $\mu$ L dH<sub>2</sub>O. To prevent unspecific binding of ThT to the glass surface, 2% (w/v) Bovine Serum Albumin (BSA) (200  $\mu$ L in dH<sub>2</sub>O) was incubated on the coverslip for 10 minutes and then rinsed off using 500  $\mu$ L dH<sub>2</sub>O.

### 3. A $\beta$ 42 Monomer Labeling Procedure

HPLC-purified synthetic A $\beta$ 42 that carried an N-terminal cysteine (Watson bio) was dissolved in 10 mM NH<sub>4</sub>OH and sonicated on ice for 30 minutes. The dissolved A $\beta$ 42 was mixed in equal volume with a solution of 50 mM NH<sub>4</sub>HCO<sub>3</sub> and 50  $\mu$ M tris(2-carboxyethyl)phosphine (TCEP) with pH of 4. This final solution had pH between 7.0 and 7.5. The solution was transferred to a glass vial with stir bar. Alexa-647 C<sub>2</sub> Maleimide (ThermoFisher Scientific, A20347) in DMSO solution (30  $\mu$ L of 10 mg/mL) was added to the solution while stirring. The solution was stirred overnight at 5 °C in the dark. Afterwards, 2  $\mu$ L of  $\beta$ -mercaptoethanol (BME) was added to the solution. The solution was then frozen in liquid nitrogen and lyophilized. The lyophilized peptide was dissolved in 1 mL formic acid, and the solution was diluted 1:1 with dH<sub>2</sub>O before purified by high performance liquid chromatography (HPLC). The solution was then frozen in liquid nitrogen and lyophilized. Finally, the peptide was dissolved in hexafluoro-2-propanol (HFIP), and frozen in liquid nitrogen and lyophilized.

### 4. Intrinsically-Labeled A $\beta$ 42 Preparation

80  $\mu$ g of unlabeled monomeric A $\beta$ 42 in 100  $\mu$ L of 10 mM NaOH and 0.8 nmol of monomeric A $\beta$ 42 covalently labeled with Alexa Fluor 647 C<sub>2</sub> Maleimide in 20  $\mu$ L of 10 mM NaOH were mixed and sonicated on ice for 25 min. The mixture was filtered by centrifugation through a 0.2  $\mu$ m and then through a 30 kD membrane filter. Peptide concentration and fraction of labeled monomer (4.2%) were calculated from UV-Vis absorption spectra (Implen, Nanophotometer, P330). Monomeric A $\beta$ 42 peptide (50  $\mu$ M) was incubated at 37 °C for 40 hours without shaking. The fibrils were adsorbed to the coverslip as described in "Imaging Sample Preparation".

### 5. Antibody-Labeled A $\beta$ 42 Preparation

2% BSA in 200  $\mu$ L of PBS with mouse anti-A $\beta$  antibody 6E10 (Signet 9320) primary antibody (1:300 dilution) was incubated on the coverslip prepared in "Imaging Sample Preparation" for 1.5 hour. Afterwards, the coverslip was washed with 200  $\mu$ L PBS for 5 times. Then 2% BSA in 200  $\mu$ L of PBS with Alexa-647 labeled Goat Anti-Mouse IgG secondary antibody (1:200 dilution, Thermo Fisher Scientific, A-21236) was added to the coverslip and left for 1 hour. Afterwards, the coverslip was washed with 200  $\mu$ L PBS 5 times.

### 6. $\alpha$ -Synuclein Preparation

$\alpha$ -synuclein was expressed in *Escherichia coli* and purified as described previously<sup>[2]</sup> and then lyophilized for storage. Lyophilized protein was dissolved in 10 mM NaOH to final concentration of 1 mg/mL, vortexed gently and sonicated in a water bath at 20 °C for 15 minutes. The suspension was then centrifuged at 50,000 RPM at 4 °C for 20 minutes after which the supernatant was collected. 90  $\mu$ M  $\alpha$ -synuclein was aggregated in 40  $\mu$ M ThT and 200 mM Na<sub>3</sub>PO<sub>4</sub> with a 2 mm glass bead. Aggregation kinetics were recorded on an InfiniTE M200 Tecan plate reader with a shake time of 5 seconds, kinetic interval of 15 minutes, amplitude of 1 mm for 400 cycles. The sample was adsorbed onto a glass coverslip as described in "Imaging Sample Preparation".

### 7. IAPP Preparation

HPLC purified 37 aa islet amyloid polypeptide (IAPP) purchased from R. Volkmer (Charite, Berlin) was dissolved in hexafluoro-2-propanol (HFIP) and sonicated at room temperature for one hour in a water bath sonicator. After freezing in liquid nitrogen, HFIP was removed by lyophilization, and aliquots of the peptide were stored at  $-20$  °C. To prepare unlabeled monomer, lyophilized IAPP was dissolved in 10 mM NaOH, sonicated for 25 min in cold water bath, and filtered first through a 0.2  $\mu$ m and then through a 30 kD

membrane filter (Millipore). IAPP fibrils were formed by incubating 30  $\mu\text{M}$  monomeric peptide in 150 mM NaCl, 50 mM  $\text{Na}_3\text{PO}_4$ , pH 7.4 with 20  $\mu\text{M}$  ThT at 37 °C with 5 seconds of shaking every 10 minutes. Fibril formation was monitored by measuring aggregation kinetics through ThT fluorescence in a microplate reader (Tecan, InfiniTE F200). Samples were taken out after 24 hours and adsorbed onto a glass coverslip as described in "Imaging Sample Preparation".

### 8. Tau Protein Preparation

The wild type 2N4R tau protein (TauRD) was a generous gift from Marc Diamond (UT Southwestern). The protein was expressed and purified as previously described.<sup>[3,4]</sup> Tau RD was lyophilized in tubes. To dissolve the protein, 20  $\mu\text{L}$  of 100 mM dithiothreitol (DTT), 50  $\mu\text{L}$  of 400 mM NaCl, 50  $\mu\text{L}$  of 40 mM HEPES (4-(2-hydroxyethyl)-1-piperazineethanesulfonic acid), and 48  $\mu\text{L}$  of  $\text{dH}_2\text{O}$  was added to the tube in this order. This was incubated at 20 °C for 1 hour. Afterwards, 32  $\mu\text{L}$  of 50  $\mu\text{M}$  heparin was added. This was then incubated at 20 °C for 17 hours, allowing it to fibrilize. The sample was then adsorbed onto a glass coverslip as described in "Imaging Sample Preparation".

### 9. Light Chain Preparation

Immunoglobulin light chain ( $\lambda$ -AL-1) was purified from urine of patients suffering from light chain amyloidosis as previously published.<sup>[5]</sup> The diagnosis of AL Amyloidosis was established via Congo red staining of fat aspirates and/or tissue biopsies<sup>[6]</sup> at the Amyloidosis Center Heidelberg according to established clinical protocols and in compliance with the ethical guidelines for treatment and patient consent. To form amyloid fibrils, AL protein (40  $\mu\text{M}$ ) was incubated in glycine buffer pH 2.8, 150 mM NaCl, 8 mM DTT, 0.05% sodium azide for 7 days under permanent shaking with 200 rpm at 37 °C in a non-binding 1.5 mL tube. The sample was adsorbed onto a glass coverslip as described in "Imaging Sample Preparation" for imaging.

### 10. Optical Instrumentation

Two epi-fluorescence microscopes were used for TAB imaging (Fig. 1A, Fig. S1, and Table S1).

Microscope 1: This home-built system captures fluorescence using two polarization channels.<sup>[7]</sup> Samples were illuminated with an inclined 488 nm or 637 nm excitation laser (Coherent, OBIS 488 LX150, OBIS 637 LX140, 30° tilt from normal illumination) through an oil-immersion objective lens (Olympus, UPLSAPO100XO/1.4 NA oil). Fluorescence was collected by the same objective and filtered by appropriate dichroic and bandpass filters. Afterward, the fluorescence was passed through a polarizing beam splitter (Meadowlark optics, BB-100-VIS), and the two separated orthogonally-polarized channels were captured by a scientific CMOS camera (Hamamatsu, C11440-22CU). Although this system can modulate phase in the Fourier plane and create polarized fluorescence images, these capabilities were not utilized in this work.

Microscope 2: This commercial microscope (Nikon, Eclipse Ti Microscope) utilizes a 100X objective (Nikon, ApoTIRF 100X/1.49 NA oil) into which a 488 nm excitation laser (Coherent, Sapphire 488 LP-150) was coupled for high incident angle illumination (75° tilt from normal illumination). Fluorescence signals were collected through a custom filter cube, and captured by an electron-multiplying CCD camera (Andor, iXon 897).

### 11. Imaging Procedure

Images of TAB and intrinsically/antibody-labeled A $\beta$ 42 were captured as follows. Tables S2 and S3 list the detailed buffers and conditions under which each image was acquired.

TAB Imaging: 200  $\mu\text{L}$  of an imaging buffer containing ThT, NaCl, and  $\text{Na}_3\text{PO}_4$  was placed into the amyloid adsorbed chambers. Super-resolution imaging was performed using a 488 nm excitation laser. The peak intensities of the lasers at the sample were 2.2  $\text{kW}/\text{cm}^2$  in microscope 1 and 0.51  $\text{kW}/\text{cm}^2$  in microscope 2. Stacks of 5,000 or 10,000 images of 20 ms exposure were recorded.

Intrinsically/Antibody-Labeled A $\beta$ 42 Imaging: An enzymatic oxygen-scavenging buffer containing glucose, glucose oxidase, catalase, and thiol (Buffer 2, Table S2) was used to image the intrinsically-labeled and antibody-labeled A $\beta$ 42 samples. Due to a non-uniform and sparse labeling density, only a standard diffraction-limited image could be produced from the Alexa-647 dye with 637 nm excitation in microscope 1. Afterwards, the illumination was switched to the 488 nm laser, and TAB imaging was performed on the same fibril in the presence of 1  $\mu\text{M}$  ThT. Super-resolution imaging was performed on the Alexa-647 labeled antibody using the 637 nm excitation laser (peak intensity: 10  $\text{kW}/\text{cm}^2$ ) in microscope 1. A TAB image was taken of the Alexa-647 labeled fibril using 488 nm excitation in a similar manner as TAB imaging of intrinsically-labeled A $\beta$ 42. Image stacks of 10,000 frames with 15 ms exposure were captured for Alexa-647 dSTORM.

Time-lapse imaging of amyloid remodeling: A $\beta$ 42 fibrils were adsorbed to ozone-cleaned chambers as described in "Imaging Sample Preparation", but this time without the BSA incubation for increasing reachability of EGCG to amyloid structures. EGCG (Taiyo International, Sunphenon EGCG) was added to an imaging buffer in the amyloid adsorbed chambers in order to remodel and dissolve structures of amyloid fibrils.<sup>[8]</sup> After variable-length incubations (as indicated in Figs. 4 and S7, and Supporting Movie S1) in the presence of 1 mM EGCG at room temperature (21 °C), the sample was rinsed and replaced with the ThT imaging buffer for TAB imaging. This procedure was repeated over 46 hours.

### 12. Atomic Force Microscopy

Aliquots of A $\beta$  aggregation time points (10  $\mu\text{L}$ ) were placed on a clean, freshly cleaved grade V-1 mica (Cat#: 01792-AB, Structure Probe, Inc., USA). After 10 minutes, the solvent was wicked off by filter paper and the mica was washed 4 times with 20  $\mu\text{L}$  of water to remove salts and buffer from the sample. Samples were dried overnight, and AFM images were acquired in tapping mode on a Veeco Dimension 3100 machine (Bruker) with Bruker FESP tips.

### 13. Quantification of Photons Detected, Background Photons, and Localization Precision

The captured image stacks were offset corrected by subtracting dark images. Images were then localized using the ThunderSTORM plugin<sup>[9]</sup> within ImageJ using default settings except the following: camera parameters were set as in Table S1; a peak intensity threshold was set between  $\text{std}(\text{Wave.F1})$  and  $2.5 \cdot \text{std}(\text{Wave.F1})$  to avoid false localizations of background fluorescence. Post-processing on the images captured in microscope 1 and 2 was performed using custom analysis scripts written in MATLAB (Mathworks, R2016a, R2017a). A list of estimated single-molecule positions  $(x, y)$  and point spread function (PSF) widths  $(\sigma)$  was produced by ThunderSTORM. Detected photons per localization were obtained by summing all photons within a region of interest ( $7 \times 7$  pixels in microscope 1,  $3 \times 3$  pixels in microscope 2) centered at the location  $(x, y)$  of each molecule. This integrated photon count was then background corrected using the average photons per pixel in the surrounding region (Fig. S2A). The following filtering was performed to reject false localizations due to background fluorescence and low signal-to-noise ratio: localizations of single-molecules were only retained if: 1) the number of photons detected was larger than 100, and 2) the measured PSF widths were reasonable ( $50 \text{ nm} < \sigma < 150 \text{ nm}$  in microscope 1,  $100 \text{ nm} < \sigma < 260 \text{ nm}$  in microscope 2). The estimated localization precision, or the best possible localization uncertainty for the least-squares fitting algorithm, was calculated based on the photons detected and the background as previously described.<sup>[10]</sup>

#### 14. Dual-Channel Registration

A registration process was required for analyzing dual-channel images captured in microscope 1. The geometric transformation between the two channels on the sCMOS camera was calibrated using fluorescent beads (Thermo Fisher Scientific, FluoSpheres,  $0.1 \mu\text{m}$ , 505/515, F8803) adsorbed onto an ozone-cleaned 8-well cell culture chamber. Image acquisition of these beads was performed immediately after single-molecule super-resolution imaging. 4,000 - 180,000 photons per bead were detected with 20 ms exposure time. We imaged each bead over 8 - 10 frames, and calculated the bead positions by averaging the localizations across multiple frames from ThunderSTORM. All possible lines joining pairs of bead positions across the two channels were drawn. Control points for two-channel registration were selected by comparing the obtained lines, and keeping the largest ensemble of them with similar lengths and slopes. To create the two-channel registration map, coefficients of a global 2D polynomial transformation function were calculated using the control points as input to the *fitgeotrans* function included with MATLAB. Although the performance of the dual-channel registration map was improved by immediate calibration after single-molecule imaging, there was still a small amount of registration error when we applied the calibrated transformation function on localized single-molecule positions. This small and spatially-varying bias was most likely due to system drift between measurements. We refined the registration map by re-calculating the global 2D polynomial transformation using the scheme described above, but this time using the single-molecule localizations with high localization precision ( $< 20 \text{ nm}$ ). Finally, localized single molecules were paired across the two channels by selecting the nearest neighbor in the target channel to the transformed position from the source channel, within a spatial range corresponding to 3 times the localization precision. The average of the positions from the transformed and target channels is taken to be the location of the paired single molecule. All paired and unpaired localized positions were kept for reconstructing super-resolved images of amyloid structures and measuring photons detected and localization precision. For paired localizations, the sum across the two channels was designated as the number of photons detected (Fig. S2D) and background (Fig. S2E). The calculated localization precisions from both channels were concatenated and reported as the localization performance of TAB imaging in microscope 1 (Fig. S2F).

#### 15. Amyloid Structure Reconstruction and Region of Interest Selection

2D amyloid structures were visualized by assembling and binning all single-molecule localizations within  $20 \times 20 \text{ nm}^2$  bins (Fig. S2B). The full-width at half-maximum (FWHM) of cross-section profile was measured over the length of reconstructed fibrils to characterize apparent fibril widths. An additional region of interest (ROI) selection was applied on the reconstructed image in order to extract ThT blinking characteristics on the structures of interest. The super-resolution image was converted into a binary image based on a threshold of 2 localizations/bin. Afterward, the largest connected structure was found from the image using the *bwconncomp* function in MATLAB after filling holes in the binary image using *imfill*. The boundary of the ROI was detected by *bwtraceboundary* in MATLAB, and the photon statistics of the localizations within the boundary were analyzed and reported for characterizing TAB super-resolution images.

#### 16. Localization Grouping across Consecutive Frames

In order to quantify the kinetics of ThT fluorescence measured across multiple camera frames, we grouped localizations of ThT blinking together into "bursts". Localized ThT molecules in a frame were grouped with localizations in the consecutive frames by selecting the nearest neighbors within a spatial circle corresponding to 3 times the localization precision. Photons detected from the grouped localizations were summed and designated as total photons detected per burst (Fig. S2H). The length (or on-time) of each ThT burst was reported as the number of frames within which localizations were successfully grouped, in units of exposure time (20 ms, Fig. S2I). The time constant of a fit to an exponential decay was obtained to measure the mean of on-time of all ThT bursts.

#### 17. Imaging Buffer Comparison

We varied the NaCl and ThT concentrations, and pH of the imaging buffer to test ThT blinking on amyloid structures under different imaging conditions. For the NaCl comparison, 4 different NaCl concentrations (10, 150, 300, 500 mM) were tested with 20 mM  $\text{Na}_3\text{PO}_4$ , 1  $\mu\text{M}$  ThT, pH 8.6. We imaged 12 unique A $\beta$ 42 fibrils for each condition. Photons detected per localization, background photons per pixel, photons detected per burst, on-time per burst, and localization rate were reported (Fig. S3A). ThT blinking under 5 different pH (6.0, 6.8, 7.4, 8.0, 8.6) was quantified with 500 mM NaCl and 1  $\mu\text{M}$  ThT. For this measurement, we imaged 5 identical A $\beta$ 42 fibrils using the different buffers. Similarly, ThT concentration (0.1, 0.5, 1, 2, 5  $\mu\text{M}$ ) influence on TAB performance was tested using 3 long identical A $\beta$ 42 fibrils with 150 mM NaCl and pH 7.4. The imaging buffers were exchanged completely between each imaging acquisition in a random order. Analogous ThT statistics were reported in Fig. S3B.

## Supporting Figures

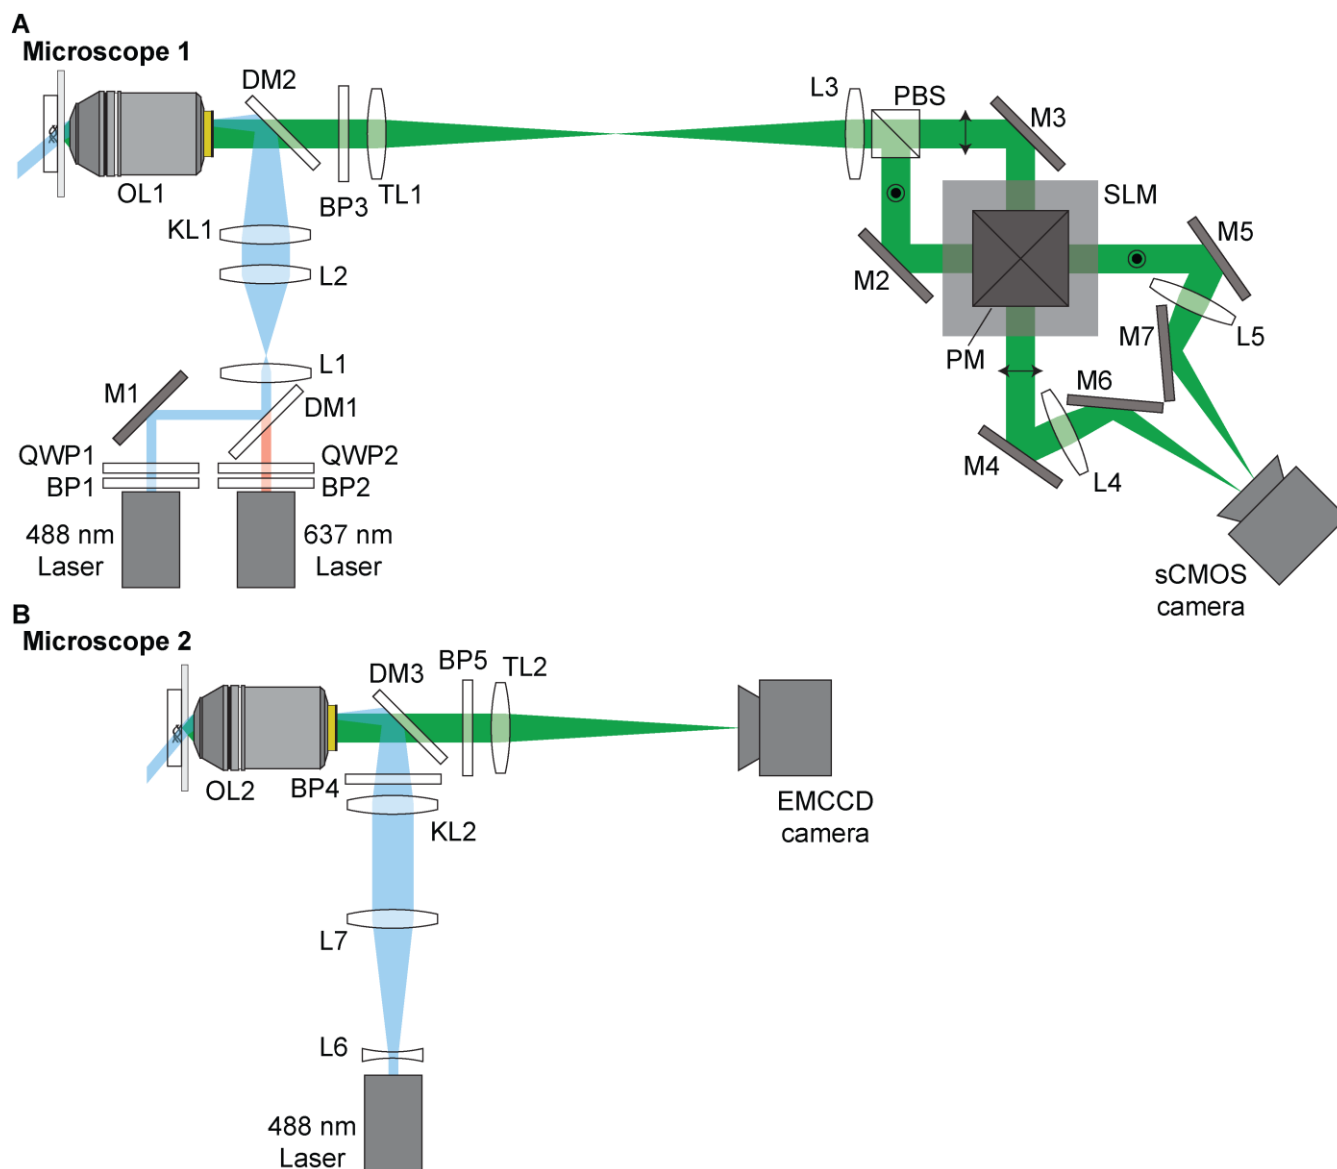

**Figure S1.** Detailed schematics of the optical setups. (A) Microscope 1. Circularly-polarized 488 nm and 637 nm lasers were used for illumination during TAB and intrinsically/antibody-labeled imaging, respectively. After beam expansion by lenses L1 ( $f = 25.4$  mm) and L2 ( $f = 76.2$  mm), the excitation lasers were coupled into a 100X oil-immersion objective (OL1, 1.4 NA) for highly-inclined illumination. Fluorescence was collected by the same objective and filtered by dichroic (DM2) and bandpass (BP3) filters listed in Table S1. Afterward, the fluorescence was split by a polarizing beam splitter (PBS) into two orthogonally-polarized channels, and lens L3 ( $f = 150$  mm) projects the pupil plane onto a spatial light modulator (SLM) using a square pyramidal mirror (PM). After reflection, the two channels were imaged onto different portions of the sCMOS camera by lenses L4 and L5 ( $f = 150$  mm). Although this system can modulate the phase of fluorescence in the Fourier plane using the SLM,<sup>[7]</sup> this capability was not utilized in this work. (B) Microscope 2. Pseudo-TIRF illumination excites fluorophores within the sample. Collected fluorescence was filtered by a custom filter cube containing a dichroic mirror (DM3) and a bandpass filter (BP4) before being captured by an EMCCD camera. BP1-5, bandpass filters; QWP1-2, quarter wave plates; M1-7, mirrors; DM1-3, dichroic mirrors; L1-7, lenses; KL1-2, widefield lenses; OL1-2, objective lenses; TL1-2, tube lenses.

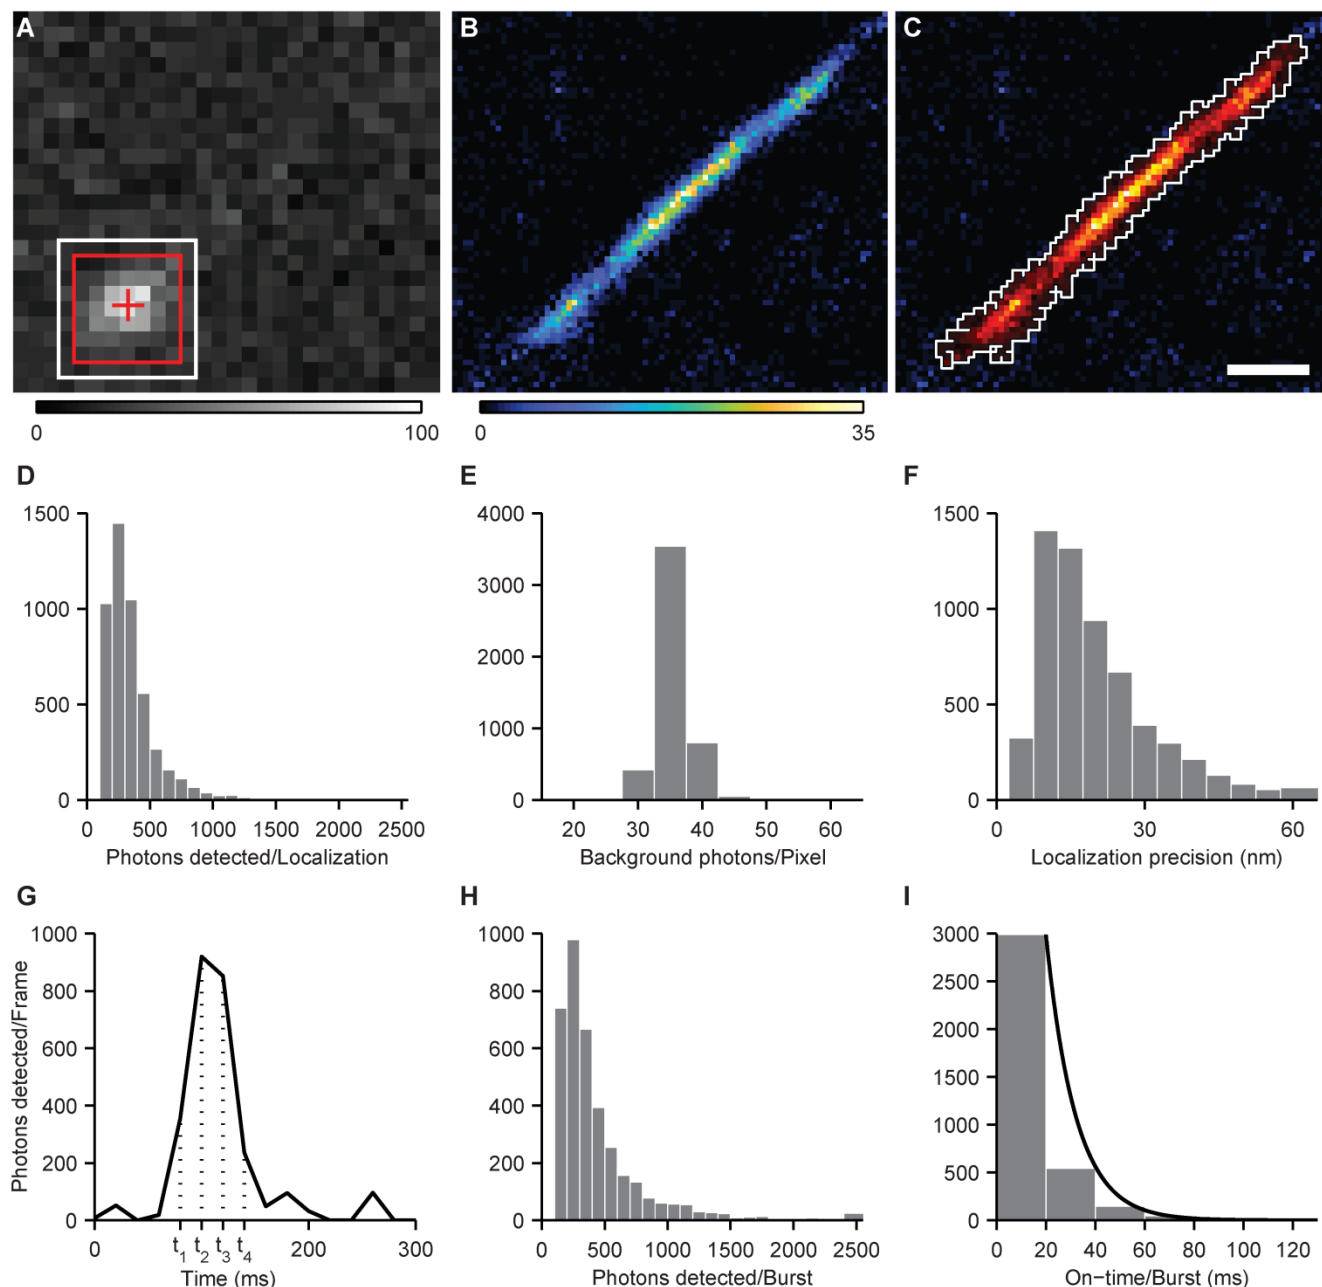

**Figure S2.** Analysis of ThT localization and blinking events. (A) A captured ThT blinking event on an A $\beta$ 42 fibril in microscope 1. Gray scale denotes the number of photons detected per pixel. Detected photons per localization were calculated by integrating all photons within a region of interest (red square) centered at the location output by ThunderSTORM (red cross). The integrated photon number was then background corrected using the average photons within the surrounding pixels between the red and white squares. (B) TAB super-resolution image of the A $\beta$ 42 fibril after the filtering and the two channel registration process described in Supporting Notes 13 and 14. The color scale denotes the number of localizations per bin. (C) Region of interest (ROI) selection (Supporting Note 15). The hot color scale shows the region of interest associated with the fibril, while the white line depicts the boundary of this ROI. Scale bar: 300 nm. (D-F) Histograms of photons detected/localization, background photons/pixel, and the localization precision of ThT bursts observed in the image stack (5000 frames, 100 s) within the ROI. (G) Photons detected over time in the red square in A. Localizations over consecutive frames ( $t_1$ - $t_4$ ) were grouped together as a single "burst", and the detected photons from each ThT burst were analyzed after the localization grouping process (Supporting Note 16). (H and I) Histograms of photons detected and the on-time of ThT bursts after the localization grouping process. Black solid line in I depicts the fitting result to an exponential decay. The median of photons detected per burst was 319; the time constant of the exponential fit was 12 ms. This data corresponds to the fibril shown in Fig. 1D in the main text.



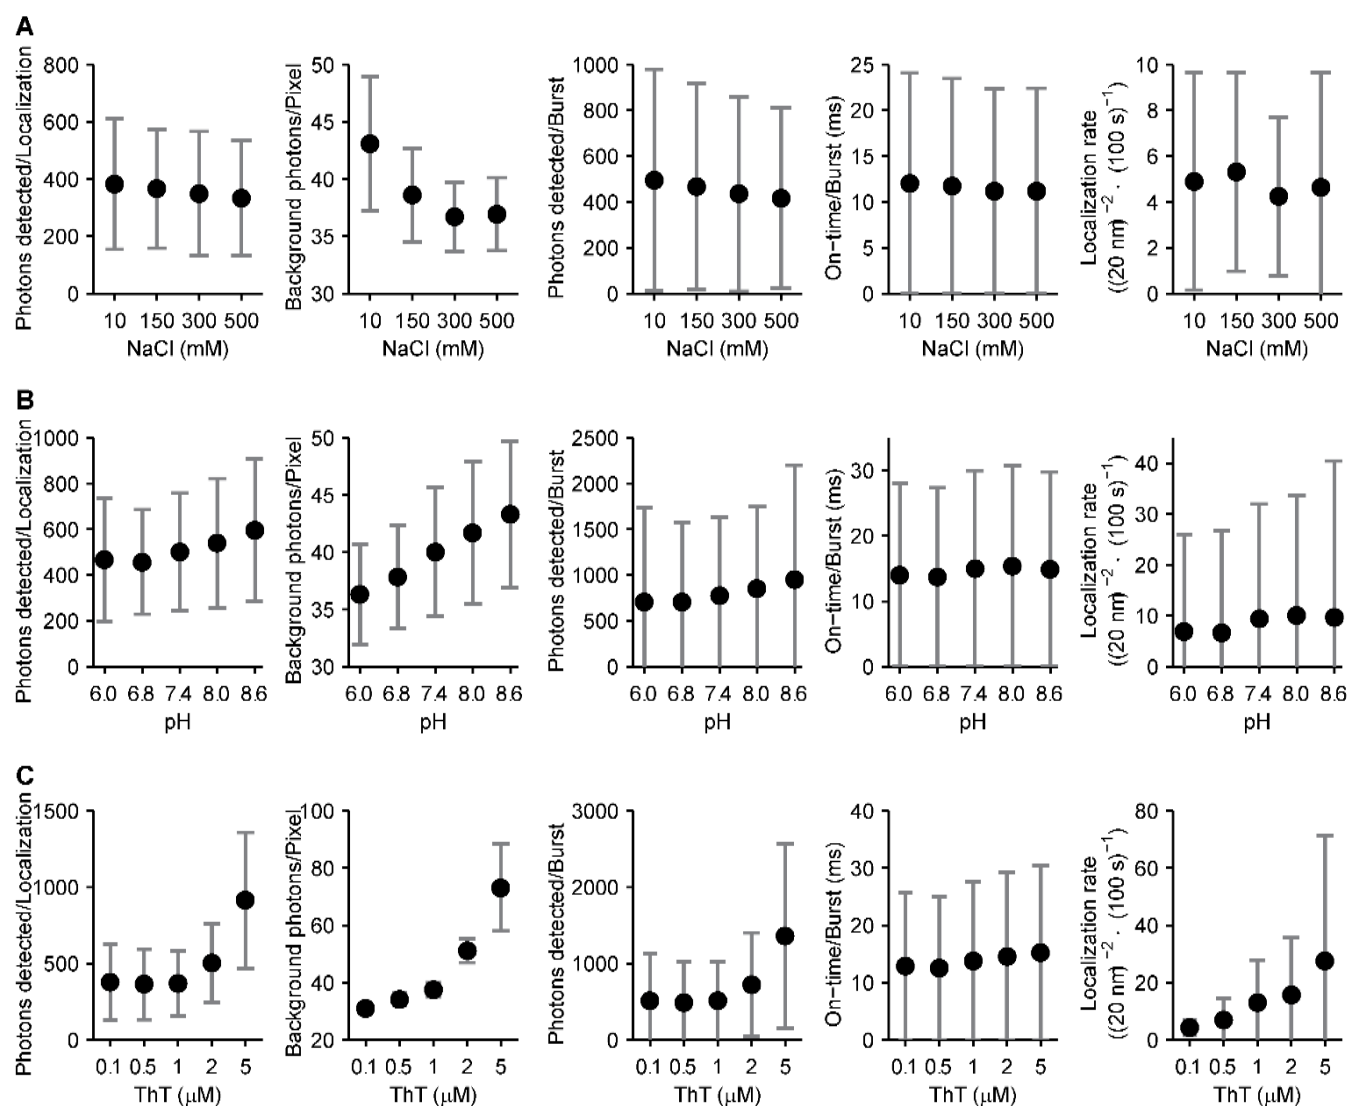

**Figure S3.** Imaging buffer effects on ThT blinking. ThT blinking characteristics were measured under varying (A) NaCl concentration (10 – 500 mM), (B) pH (6.0 – 8.6), and (C) ThT concentration (0.1 – 5 μM). NaCl concentration and pH appear to have limited effect on the blinking of ThT on fibrils. However, reduced background photons/pixel were observed under high NaCl concentration and low pH conditions. On the other hand, the blinking rate of ThT, and thus the rate of locations per time, and background photons rise with increasing ThT concentration. The high blinking rate at 5 μM ThT causes images of overlapping molecules, which leads the number of photons detected and background photons per localization to rise significantly. Dots represent the mean across experiments, error bars represent standard deviations. Negative error bars are truncated at zero.

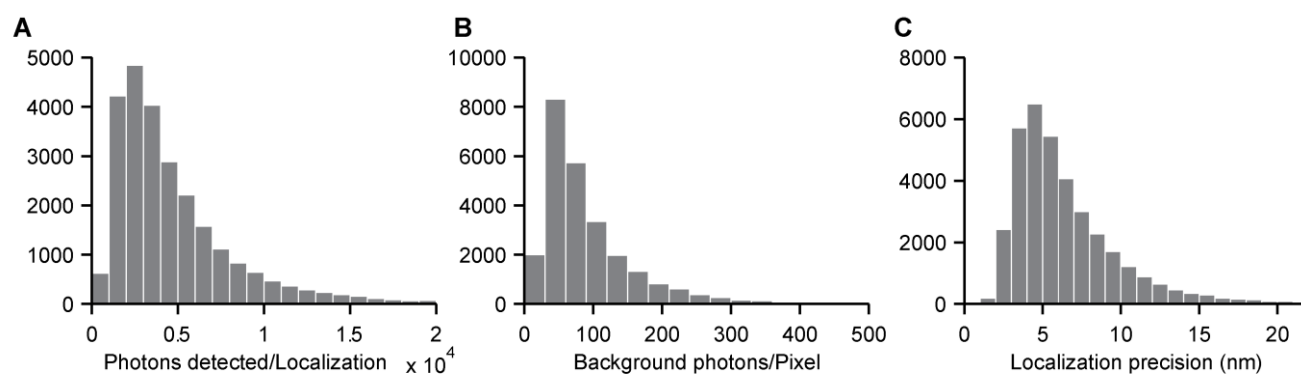

**Figure S4.** Analysis of Alexa-647 dSTORM. (A-C) Histograms of photons detected/localization, background photons/pixel, and localization precision of Alexa-647 bursts observed in the image stack (10,000 frames, 150 s).

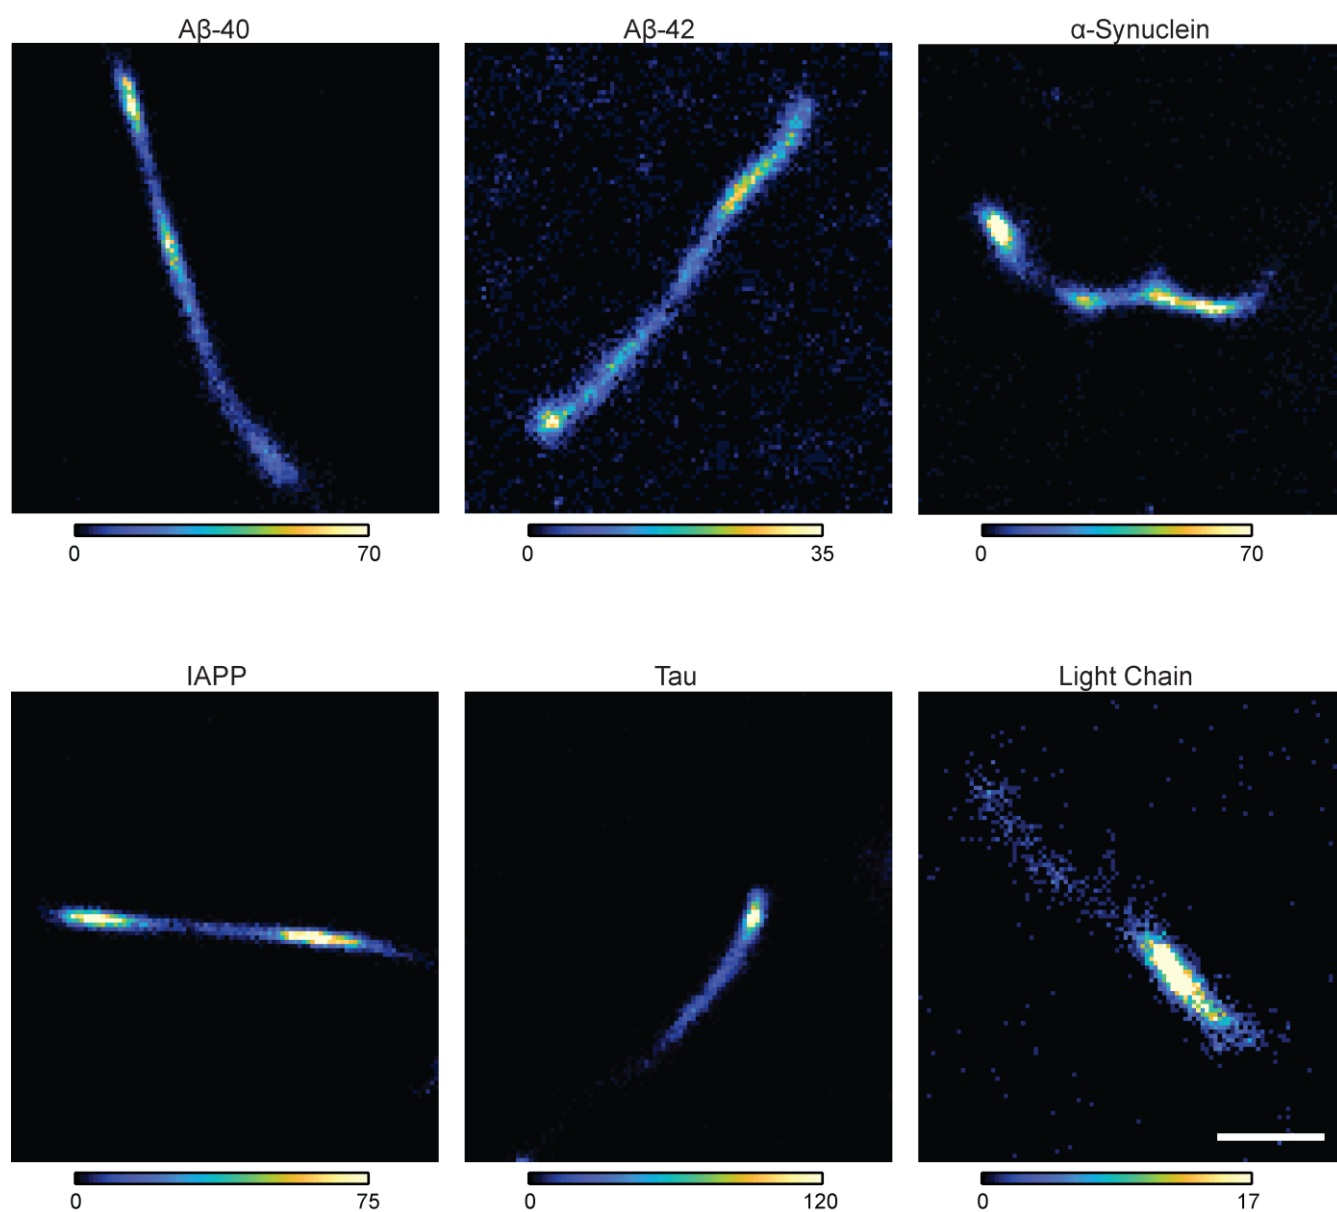

**Figure S5.** TAB super-resolution images of A $\beta$ 40, A $\beta$ 42,  $\alpha$ -Synuclein, IAPP, Tau, and Light Chain. Scale bar: 500 nm. Color bars in units of localizations/bin.

**Figure S6.** The localization rate of single ThT molecules during TAB imaging. (A) Localizations per 100 frames over time during the acquisition of imaging stacks for each TAB image in the main text. Localizations over time were approximately constant over time with no evidence of photobleaching. The discontinuity in

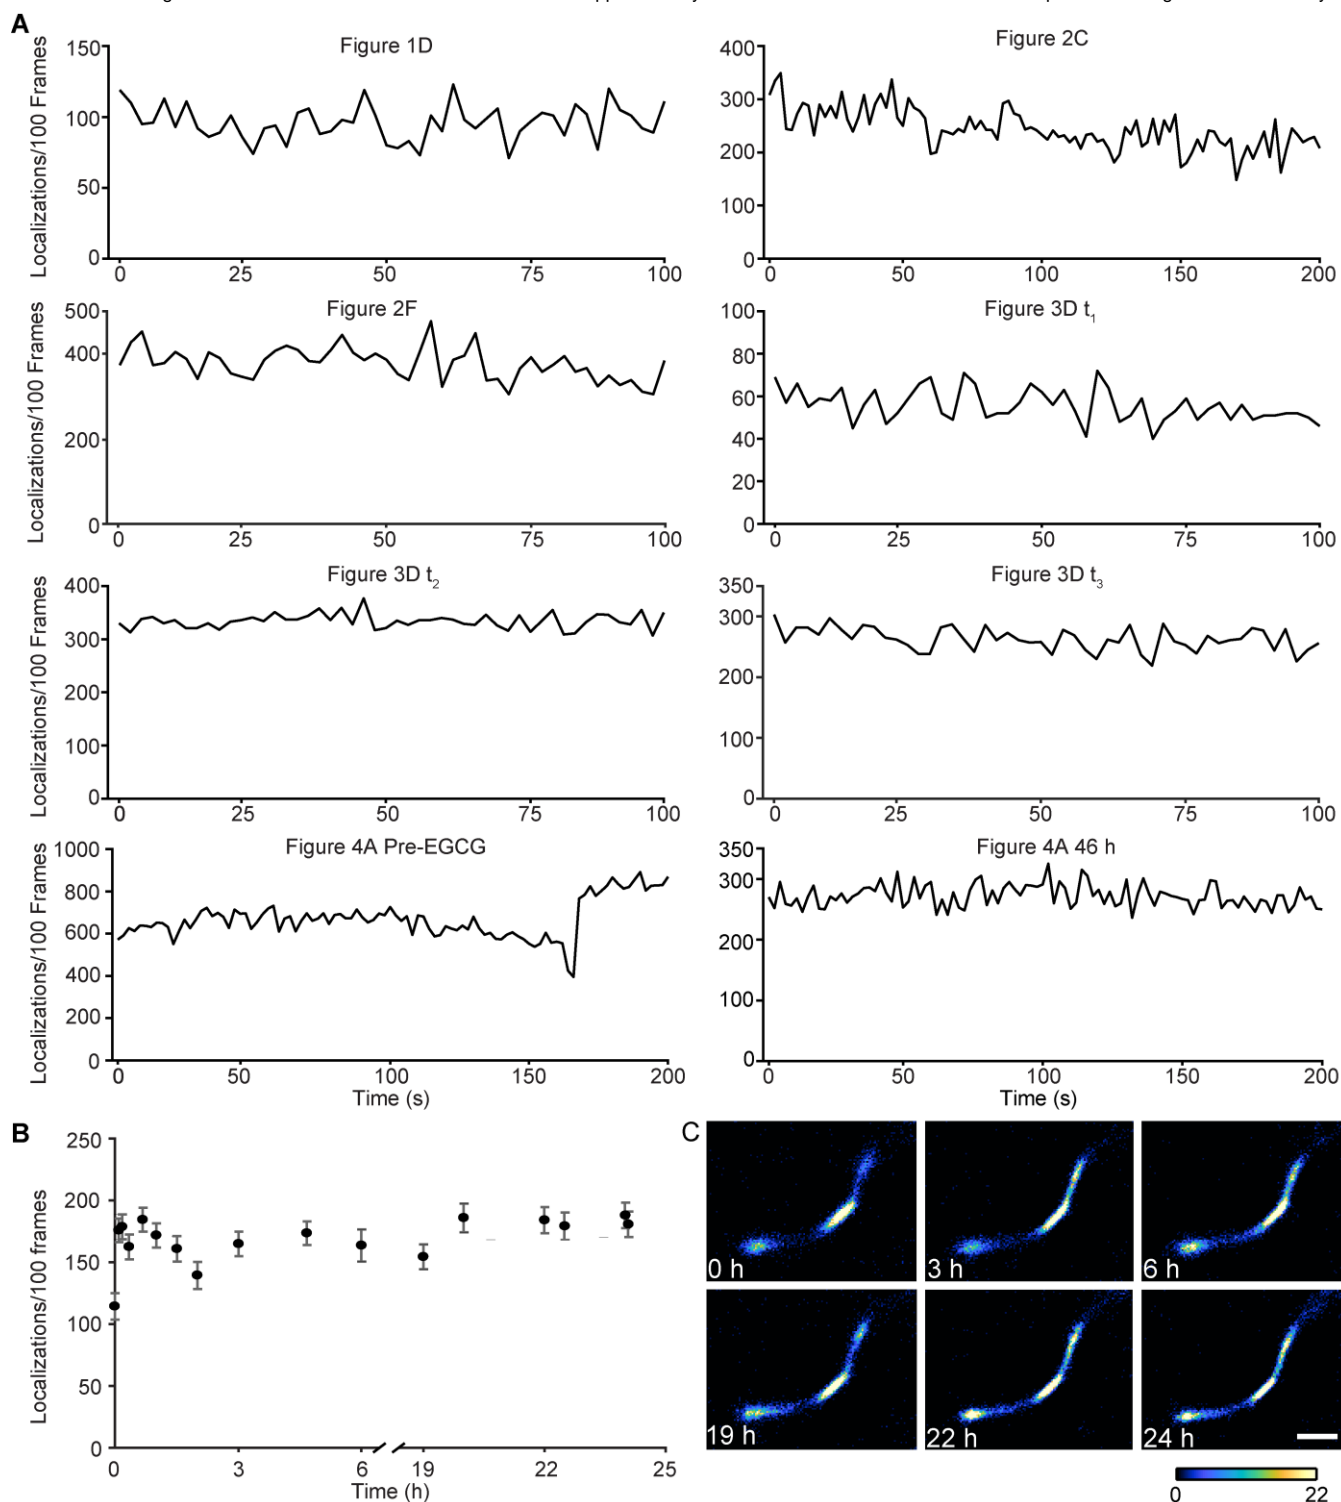

Figure 4A Pre-EGCG was due to refocusing the microscope at ~320 s into the measurement. (B) The localization rate of ThT molecules for multiple TAB images over an extended observation time. 17 time-lapse TAB image stacks were taken on an A $\beta$ 42 fibril over 24 h without changing ThT imaging buffer. The stable localization numbers show that long-term TAB imaging is feasible. (C) TAB image reconstructions at select time points from the plot in B. Images show consistent reconstruction quality of the same fibril over 24 hours. Scale bar: 500 nm. Color bar in units of localizations/bin.

**Figure S7.** Time-lapse TAB super-resolution images of A $\beta$ 42 before and 7, 22, 29, 46, 50 h after adding EGCG. The fibril was incubated with 1 mM EGCG at room temperature as described in Supporting Note 11 except for the final incubation during 46-50 h. More concentrated EGCG was added to make an 8 mM

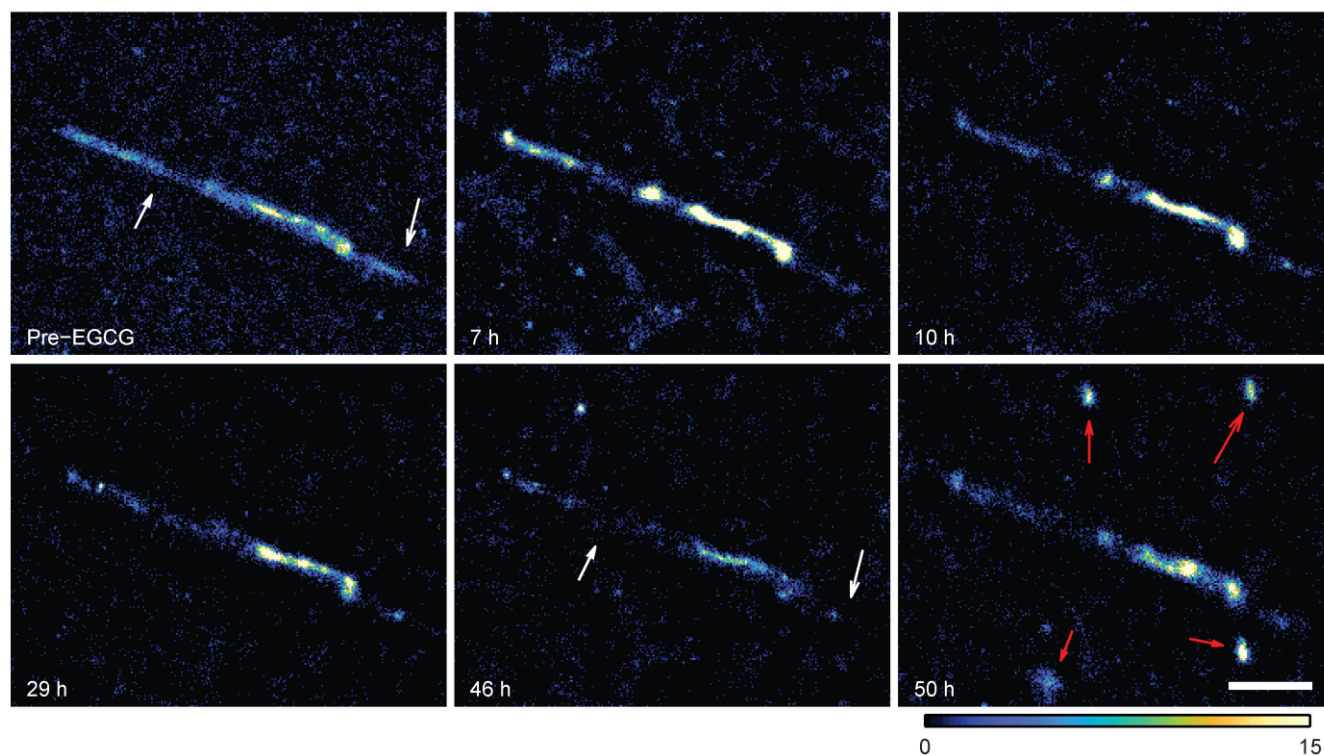

EGCG buffer during this period in order to accelerate fibril remodeling. Gradual fibril dissolution was observed in the first 46 h incubation with 1 mM EGCG (white arrows), and some spherical assemblies were observed after the 4 h incubation in the presence of 8 mM EGCG (red arrows). Similar spherical structures were observed in our previous work using AFM.<sup>[6]</sup> Scale bar: 1  $\mu$ m; color bar in units of localizations/bin.

## Supporting Tables

**Table S1.** Components of the optical setups

|                                        | Microscope 1                           | Microscope 2                          |
|----------------------------------------|----------------------------------------|---------------------------------------|
| Basics                                 |                                        |                                       |
| Microscope body                        | Custom                                 | Nikon Eclipse Ti Microscope           |
| Objective lens                         | Olympus, UPLSAPO100XO/1.4 NA oil (OL1) | Nikon, ApoTIRF 100X/1.49 NA oil (OL2) |
| Camera                                 | Hamamatsu, C11440-22CU (sCMOS)         | Andor, iXon 897 (EMCCD)               |
| EM Gain                                | N/A                                    | 50                                    |
| Effective Pixel Size (object space)    | 58.5 nm                                | 130 nm                                |
| TAB imaging                            |                                        |                                       |
| Excitation Light Source                | Coherent, OBIS 488 LX150               | Coherent, Sapphire 488 LP-150         |
| Excitation Bandpass Filter             | Semrock, FF01-488/6-25 (BP1)           | Chroma, ZET488/10x (BP4)              |
| Dichroic Mirror                        | Semrock, Di03-R488/561-t1 (DM2)        | Chroma, ZET488rdc (DM3)               |
| Emission Bandpass Filter               | Semrock, FF01-523/610 (BP3)            | Chroma, ZET488NF (BP5)                |
| Intrinsically/antibody-labeled imaging |                                        |                                       |
| Excitation Light Source                | Coherent, OBIS 637 LX140               | N/A                                   |
| Excitation Bandpass Filter             | Semrock, FF01-637/7-25 (BP2)           | N/A                                   |
| Dichroic Mirror                        | Semrock, Di02-R635 (DM2)               | N/A                                   |
| Emission Bandpass Filter               | Semrock, FF01-676/37 (BP3)             | N/A                                   |

Detailed schematics are shown in Fig. S1. Abbreviations in parentheses refer to corresponding components in Fig. S1.

**Table S2.** Imaging buffers

|                                 | Buffer 1 | Buffer 2 | Buffer 3 | Buffer 4 |
|---------------------------------|----------|----------|----------|----------|
| pH                              | 8.6      | 8.3      | 8.3      | 7.4      |
| NaCl                            | 500 mM   | -        | -        | 150 mM   |
| Na <sub>3</sub> PO <sub>4</sub> | 20 mM    | -        | -        | 20 mM    |
| ThT                             | 1 μM     | -        | 1 μM     | 2.5 μM   |
| GLOX + MEA <sup>[a]</sup>       | -        | +        | +        | -        |

[a] Enzymatic oxygen scavenger (GLOX, glucose oxidase with catalase) and thiol buffer (MEA, β-mercaptoethylamine)<sup>[11]</sup> consists of two solutions. Solution A: Tris (50 mM, pH 8.3), NaCl (10 mM), glucose (10% w/v), and MEA (Sigma-Aldrich, 30070, 10 mM). Solution B: glucose oxidase (Sigma-Aldrich, G2133, 8 mg), and catalase (Sigma-Aldrich, C100, 38 μL, 21 mg/mL) in PBS (160 μL). The solutions A and B were mixed at the ratio of 99:1 (v/v) immediately before use. + or – refers to the presence or absence of the oxygen scavenger and thiol buffer.

**Table S3.** Experimental conditions and photon statistics

|                                              | Fig. 1BD     | Fig. 2A      | Fig. 2BC     | Fig. 2DE     | Fig. 2FG     | Fig. 3CD t <sub>1</sub> | Fig. 3CD t <sub>2</sub> | Fig. 3CD t <sub>3</sub> | Fig. 4A      |
|----------------------------------------------|--------------|--------------|--------------|--------------|--------------|-------------------------|-------------------------|-------------------------|--------------|
| Amyloid                                      | A $\beta$ 42 | A $\beta$ 40            | A $\beta$ 40            | A $\beta$ 40            | A $\beta$ 42 |
| Fluorophore                                  | ThT          | Alexa647     | ThT          | Alexa647     | ThT          | ThT                     | ThT                     | ThT                     | ThT          |
| Imaging Buffer                               | 1            | 2            | 1            | 2            | 3            | 1                       | 1                       | 1                       | 4            |
| Microscope                                   | 1            | 1            | 1            | 1            | 1            | 2                       | 2                       | 2                       | 1            |
| Photons detected/localization <sup>[b]</sup> | 296          | -            | 425          | 3718         | 675          | 180                     | 381                     | 264                     | 442          |
| Background photons/pixel <sup>[b]</sup>      | 35           | -            | 54           | 71           | 63           | 155                     | 195                     | 401                     | 44           |
| Localization precision (nm) <sup>[b]</sup>   | 17           | -            | 19           | 6            | 15           | 85                      | 55                      | 111                     | 16           |

[b] Median of each statistic after the post-processing described in Supporting Notes 13-15.

## Supporting Movies

**Movie S1.** Concatenated time-lapse TAB super-resolution images of A $\beta$ 42 before and 3, 7, 10, 22, 25, 29, 34, 46, 50 h after adding EGCG. The reconstructed images correspond to the fibrils shown in Fig. 4 in the main text. The fibrils were incubated at room temperature with 1 mM EGCG for the first 46 h as described in Supporting Note 11 and with 8 mM EGCG for the following 4 h (46-50 h). Log color scale is utilized in order to show structural changes in regions with fewer localizations. In each frame of the movie, TAB SR images from 3 consecutive time points are color-coded using different color maps (colored for current vs grayscale for preceding time points). TAB super-resolution imaging captured the dissolution and remodeling of the fibrils over 50 h. Scale bar: 0.5  $\mu$ m.

## References

- [1] N. Kedia, M. Almisry, J. Bieschke, *Phys. Chem. Chem. Phys.* **2017**, *19*, 18036–18046.
- [2] H. T. Lam, M. C. Graber, K. A. Gentry, J. Bieschke, *Biochemistry* **2016**, *55*, 675–685.
- [3] H. J. Wobst, A. Sharma, M. I. Diamond, E. E. Wanker, J. Bieschke, *FEBS Lett.* **2015**, *589*, 77–83.
- [4] B. B. Holmes, S. L. DeVos, N. Kfoury, M. Li, R. Jacks, K. Yanamandra, M. O. Ouidja, F. M. Brodsky, J. Marasa, D. P. Bagchi, et al., *Proc. Natl. Acad. Sci.* **2013**, *110*, E3138–E3147.
- [5] K. Andrich, U. Hegenbart, C. Kimmich, N. Kedia, H. R. Bergen, S. Schönland, E. Wanker, J. Bieschke, *J. Biol. Chem.* **2017**, *292*, 2328–2344.
- [6] G. Klatskin, *Am. J. Pathol.* **1969**, *56*, 1–13.
- [7] M. P. Backlund, M. D. Lew, A. S. Backer, S. J. Sahl, G. Grover, A. Agrawal, R. Piestun, W. E. Moerner, *Proc. Natl. Acad. Sci.* **2012**, *109*, 19087–19092.
- [8] J. Bieschke, J. Russ, R. P. Friedrich, D. E. Ehrhoefer, H. Wobst, K. Neugebauer, E. E. Wanker, *Proc. Natl. Acad. Sci.* **2010**, *107*, 7710–7715.
- [9] M. Ovesný, P. Křížek, J. Borkovec, Z. Švindrych, G. M. Hagen, *Bioinformatics* **2014**, *30*, 2389–2390.
- [10] B. Rieger, S. Stallinga, *ChemPhysChem* **2014**, *15*, 664–670.
- [11] M. Bates, G. T. Dempsey, K. H. Chen, X. Zhuang, *ChemPhysChem* **2012**, *13*, 99–107.

## Author Contributions

KS and TD contributed equally to this work. KS, TD, JL, MDL, and JB designed and performed imaging experiments. KS, YS, NK, and GRN prepared amyloid fibrils. TD and MDL built Microscope 1. JB built Microscope 2. TD and KS performed data analysis. KS, TD, MDL, and JB wrote the manuscript.
